# Supplementary material
Source: PubMed Central journal article supplement (PMC1779672)
Supplement: jphysiol_2005.103143_1.pdf [file jphysiol_2005.103143_1.pdf]

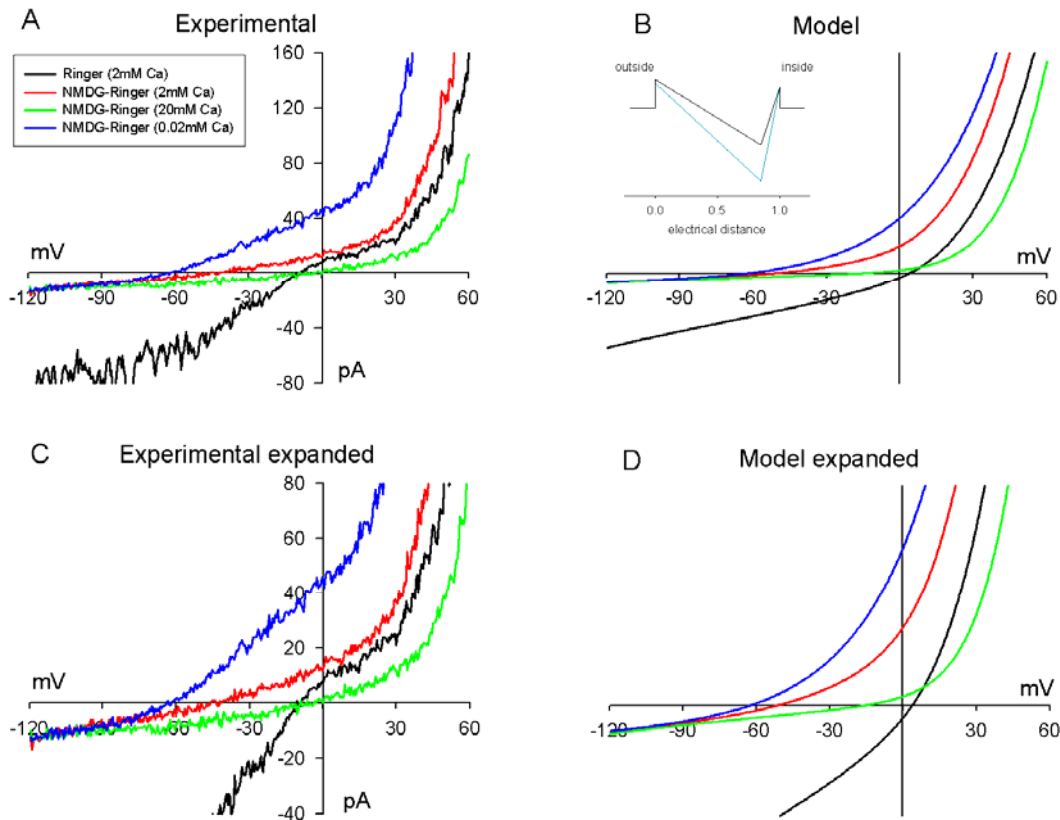

Supplementary Fig 1. **Effect of extracellular  $\text{Ca}^{2+}$  on whole-cell currents in TRPC6-expressing HEK cells: NMDG buffer with  $4 \text{ K}^+$ .** *Panel A.* Currents were recorded as described in the legend to Fig 1 in HEK cells stably expressing TRPC6. TRPC6 was activated by superfusion with normal  $\text{Na}^+$ -containing Ringer's solution containing  $100 \mu\text{M}$  OAG. A representative I-V plot under this condition is shown (black trace). The extracellular solution was changed to NMDG- $4\text{K}^+$  with  $0.02$  (blue trace),  $2$  (red trace), or  $20 \text{ mM}$   $\text{Ca}^{2+}$  (green trace). *Panel B.* I-V relationships predicted by the single site pore permeation model with the parameter set given in the legend to Fig 5. The simulated I-V plots are shown for the experimental ionic conditions shown in panel A. *Panels C and D.* Same as panels A and B with an expanded current scale to better visualize the reversal potentials under each condition.

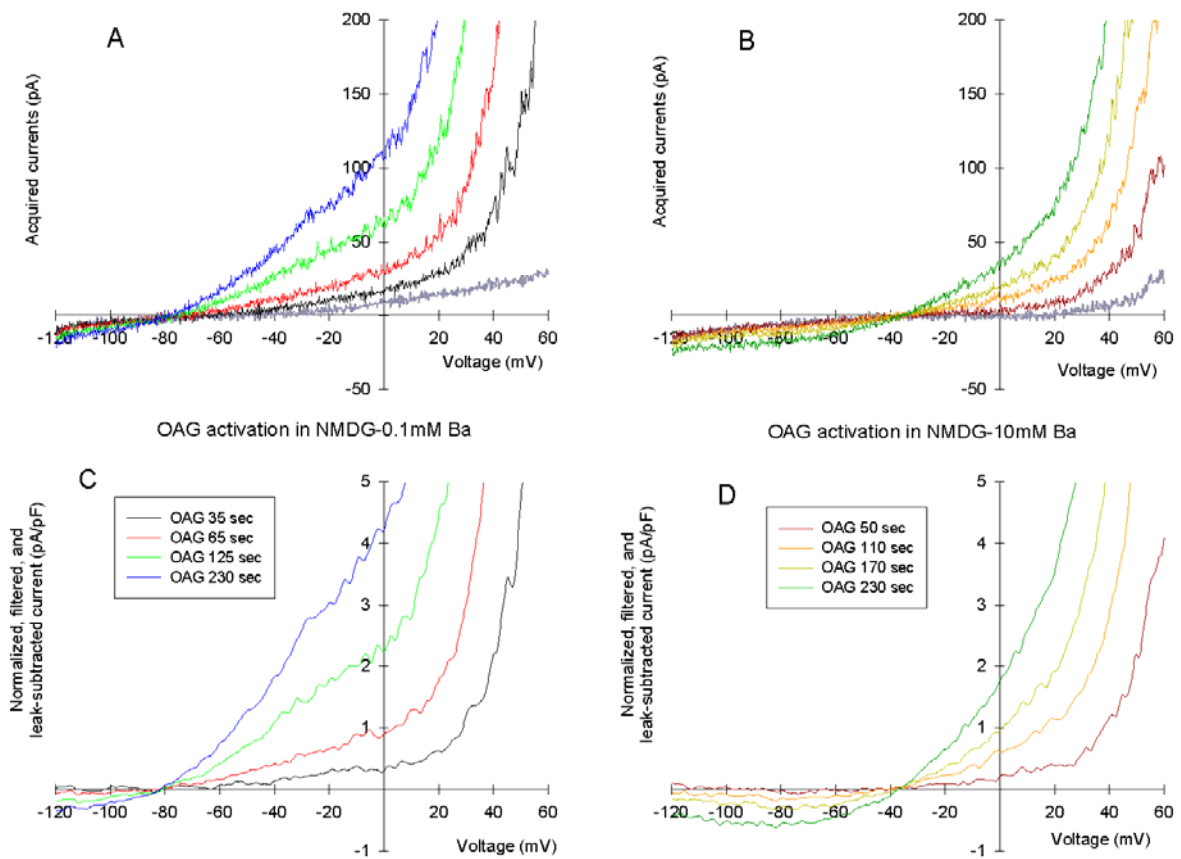

Supplementary Fig 2. **Activation of TRPC6 in low or high  $Ba^{2+}$  buffer.** *Panels A and B.* Currents were recorded as described in the legend to Fig 1 in HEK cells stably expressing TRPC6. TRPC6 was activated by superfusion with NMDG- $0K^+$ -Ringer's solution containing 0.1 mM  $Ba^{2+}$  (*Panel A*) or 10 mM  $Ba^{2+}$  (*Panel B*) plus 100  $\mu$ M OAG. I-V plots are shown before OAG and as a function of time after addition of OAG (see *inset, panels C and D*). *Panels C and D.* Currents from Panels A and B were leak-subtracted, normalized to capacitance, and filtered at 200 Hz.

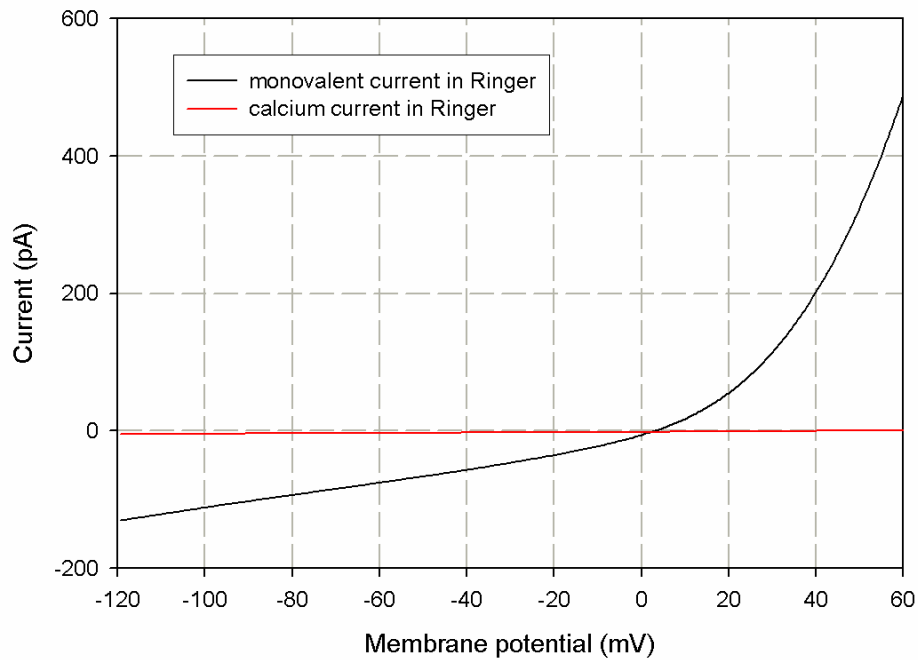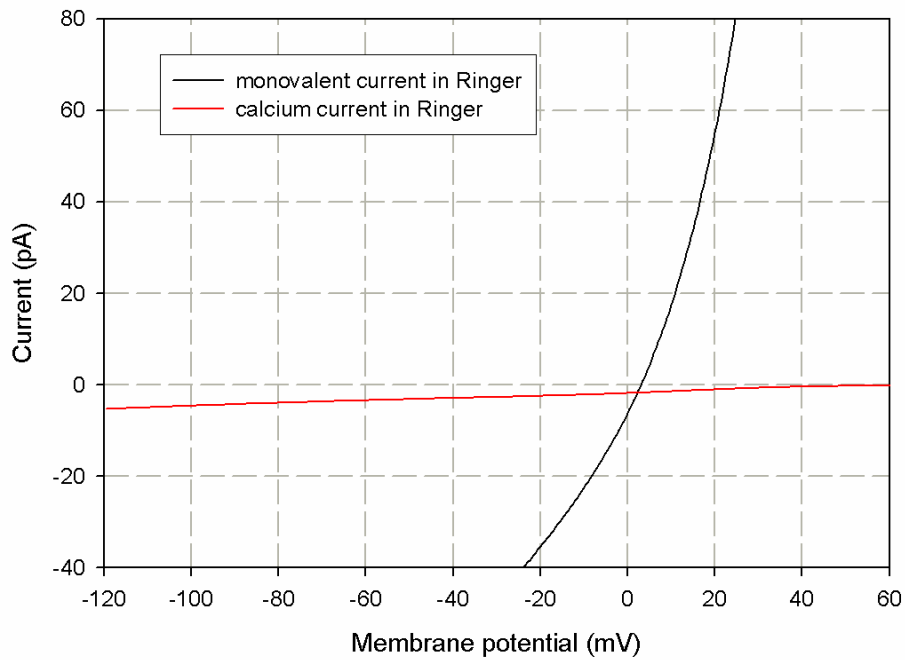

Supplementary Fig 3. **Model predications for Ca<sup>2+</sup> and monovalent current via TRPC6.** *Upper Panel.* The figure shows I-V plots for TRPC6 for monovalent current (*black trace*) and Ca<sup>2+</sup> currents (*red trace*) in normal Na<sup>+</sup>-containing Ringer's solution as predicted by the single site pore model. *Lower Panel.* Same as in the upper panel with an expanded current scale.
