# Supplementary material
Source: PubMed Central journal article supplement (PMC1779672)
Supplement: tjp0572-0359-SupMat_Fig2.pdf [file tjp0572-0359-SupMat_Fig2.pdf]

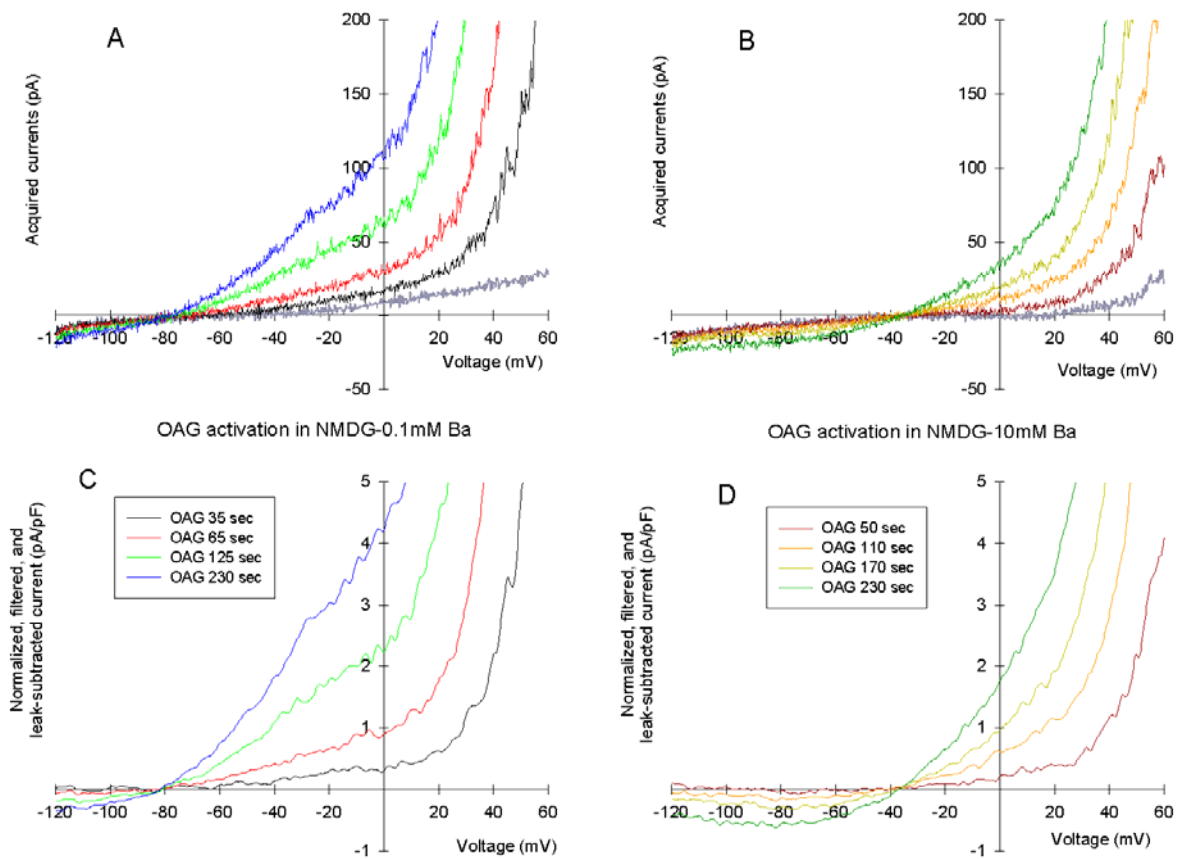

Supplementary Fig 2. **Activation of TRPC6 in low or high  $Ba^{2+}$  buffer.** *Panels A and B.* Currents were recorded as described in the legend to Fig 1 in HEK cells stably expressing TRPC6. TRPC6 was activated by superfusion with NMDG- $0K^+$ -Ringer's solution containing 0.1 mM  $Ba^{2+}$  (*Panel A*) or 10 mM  $Ba^{2+}$  (*Panel B*) plus 100  $\mu$ M OAG. I-V plots are shown before OAG and as a function of time after addition of OAG (see *inset, panels C and D*). *Panels C and D.* Currents from Panels A and B were leak-subtracted, normalized to capacitance, and filtered at 200 Hz.
