# Supplementary material
Source: PubMed Central journal article supplement (PMC1779672)
Supplement: tjp0572-0359-SupMat_fig3.pdf [file tjp0572-0359-SupMat_fig3.pdf]

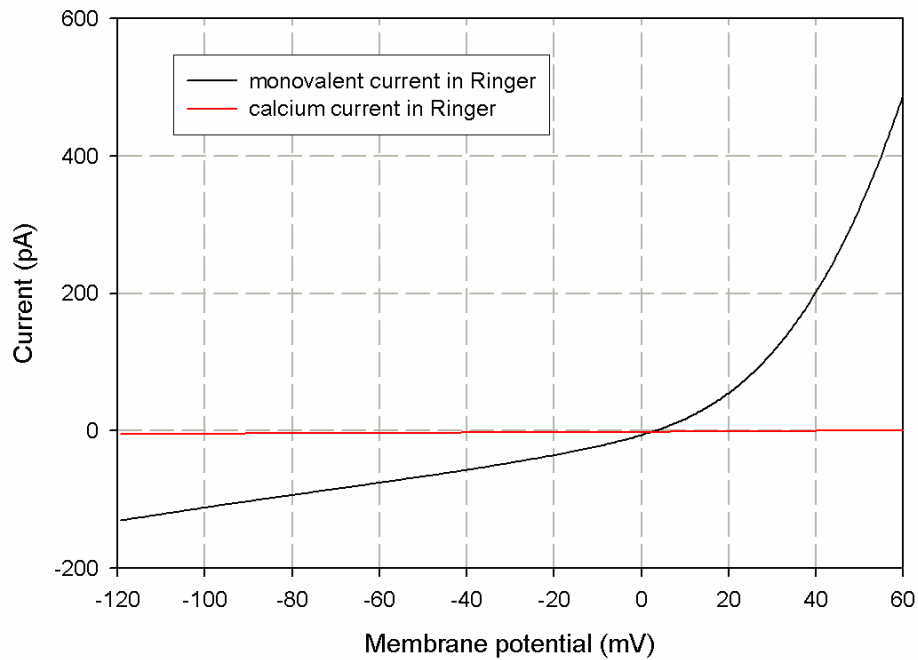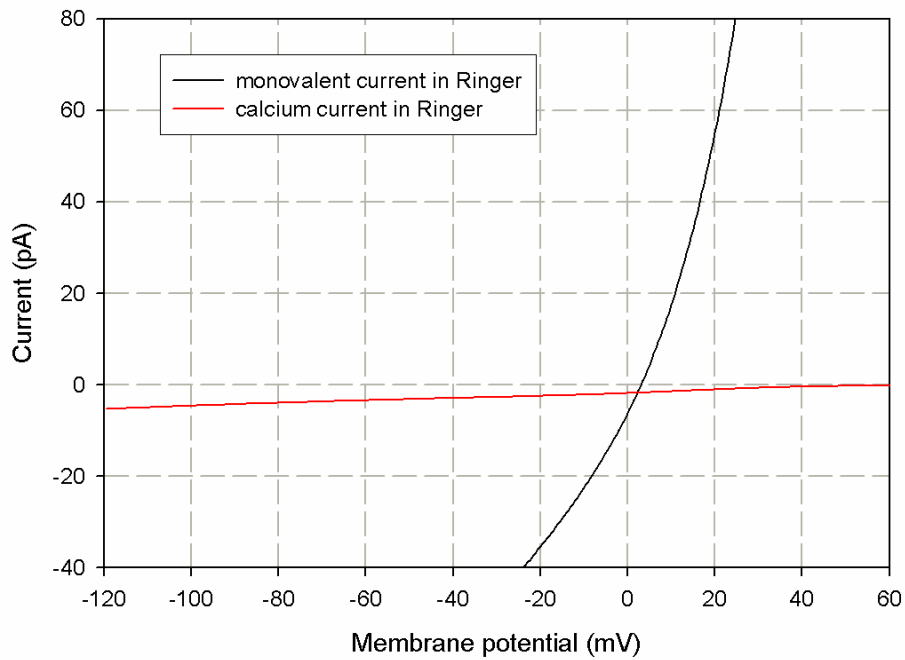

Supplementary Fig 3. **Model predications for Ca<sup>2+</sup> and monovalent current via TRPC6.** *Upper Panel.* The figure shows I-V plots for TRPC6 for monovalent current (*black trace*) and Ca<sup>2+</sup> currents (*red trace*) in normal Na<sup>+</sup>-containing Ringer's solution as predicted by the single site pore model. *Lower Panel.* Same as in the upper panel with an expanded current scale.
